# Supplementary material
Source: publisher figshare collection journal article supplement (https://diabetesjournals.figshare.com/ndownloader/files/26116862)
Supplement: Supplementary file 1 [file 26116862]

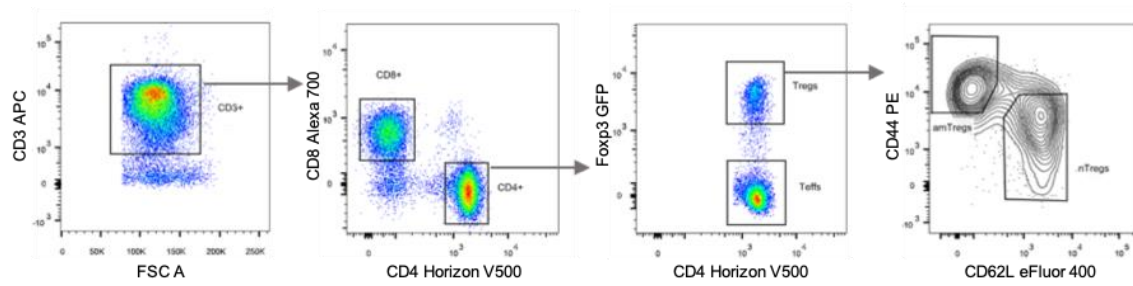

**Figure S1. Representative flow cytometry gating**

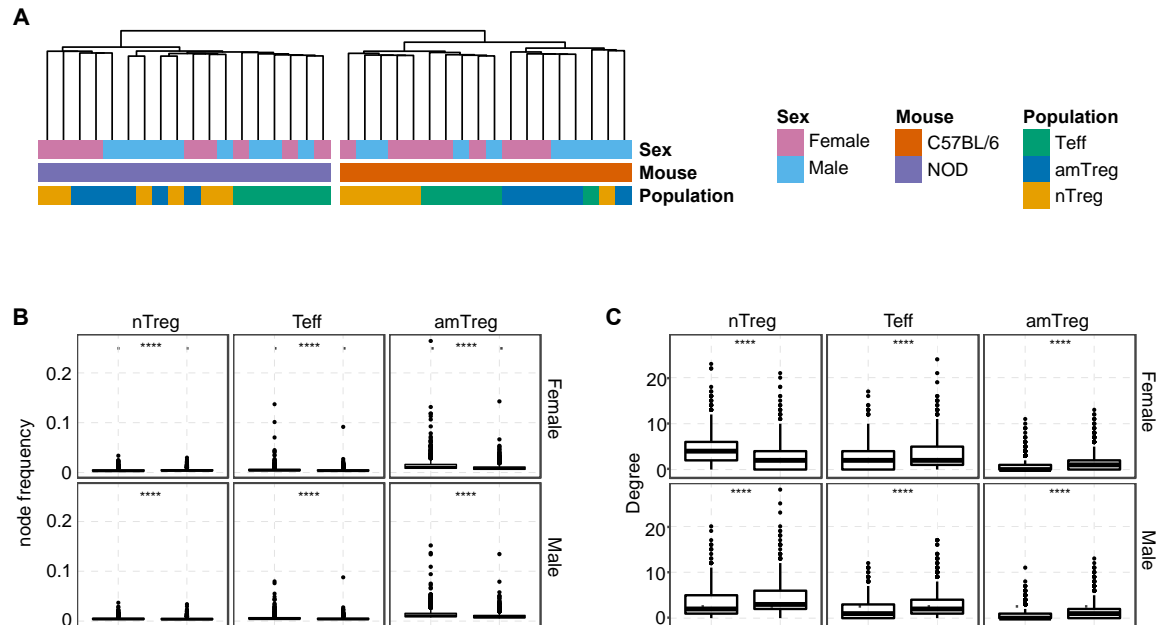

**Figure S2: No sex-biased differences between B6 and NOD samples.** (A) A hierarchical clustering was performed using Ward's method on the pairwise Jaccard distances calculated at the clonotype level. Colors represent the sex, mouse background and cell population. (B) For each cell population, the top most frequent 1000 CDR3s across same sex mice were identified based on their mean frequency and used to construct networks based on the Levenshtein distance. CDR3 frequency comparison between B6 and NOD

mice for each cell subset and sex. (C) Comparison of the degree of connectivity, which represent the number of connections of each node in a network, by sex within each cell subset. (B, C) Each dot represents a CDR3 and boxplots represent the median, first and third quartiles. Ns  $P > 0.05$ , \*\*\*  $P \leq 0.001$ , \*\*\*\*  $P \leq 0.0001$ , Wilcoxon test with Holm's correction.

| Mouse background | Sample | Proportion in CD4+ T cells (%) |       | Proportion in Tregs (%) |         |
|------------------|--------|--------------------------------|-------|-------------------------|---------|
|                  |        | Tefts                          | Tregs | nTregs                  | amTregs |
| C57BL/6          | MM1    | 81.3                           | 17.0  | 54.7                    | 40.9    |
|                  | MM2    | 79.2                           | 19.3  | 44.6                    | 49.4    |
|                  | MM3    | 82.8                           | 15.7  | 46.3                    | 47.1    |
|                  | MM4    | 81.0                           | 17.7  | 38.4                    | 55.3    |
|                  | MM5    | 85.3                           | 13.3  | 49.5                    | 44.3    |
|                  | MM6    | 82.1                           | 16.4  | 36.0                    | 58.8    |
| NOD              | MM7    | 86.0                           | 12.8  | 62.1                    | 17.3    |
|                  | MM8    | 85.0                           | 13.3  | 63.7                    | 31.8    |
|                  | MM9    | 88.0                           | 11.1  | 50.6                    | 32.6    |
|                  | MM10   | 85.5                           | 13.5  | 55.1                    | 38.4    |
|                  | MM11   | 86.5                           | 12.4  | 42.8                    | 38.6    |
|                  | MM12   | 85.3                           | 13.6  | 54.3                    | 38.8    |

**Table S1. Cell proportions in B6 and NOD mice**

| Mouse background | Sex    | Cell population | Sample | No of sorted cells | No of raw reads | No of productive sequences | No of amino acid clonotypes |
|------------------|--------|-----------------|--------|--------------------|-----------------|----------------------------|-----------------------------|
| C57BL/6          | Female | nTreg           | MM1    | 1,323,341          | 2,127,673       | 1,015,715                  | 233,660                     |
|                  |        |                 | MM2    | 1,071,840          | 2,004,480       | 733,190                    | 218,263                     |
|                  |        |                 | MM3    | 1,246,936          | 2,817,720       | 446,115                    | 135,535                     |
|                  |        | CD4 Teff        | MM1    | 5,364,460          | 3,761,403       | 1,349,423                  | 223,224                     |
|                  |        |                 | MM2    | 4,234,206          | 2,581,178       | 714,488                    | 120,433                     |
|                  |        |                 | MM3    | 4,185,207          | 4,060,009       | 807,256                    | 172,964                     |
|                  |        | amTreg          | MM1    | 1,500,745          | 2,398,861       | 1,023,589                  | 96,799                      |
|                  |        |                 | MM2    | 1,358,814          | 1,631,017       | 589,358                    | 101,868                     |
|                  |        |                 | MM3    | 1,036,280          | 2,955,847       | 1,028,115                  | 68,919                      |
|                  | Male   | nTreg           | MM4    | 1,131,312          | 1,279,418       | 500,408                    | 199,423                     |
|                  |        |                 | MM5    | 1,345,776          | 1,688,914       | 649,218                    | 195,734                     |
|                  |        |                 | MM6    | 1,071,282          | 1,533,625       | 451,775                    | 54,575                      |
|                  |        | CD4 Teff        | MM4    | 5,345,742          | 2,383,211       | 1,029,539                  | 300,505                     |
|                  |        |                 | MM5    | 3,975,052          | 2,946,289       | 794,384                    | 192,373                     |
|                  |        |                 | MM6    | 4,594,811          | 663,005         | 222,483                    | 70,411                      |
|                  |        | amTreg          | MM4    | 1,153,056          | 2,509,275       | 857,770                    | 106,989                     |
|                  |        |                 | MM5    | 1,201,394          | 2,551,643       | 823,937                    | 125,671                     |
|                  |        |                 | MM6    | 818,961            | 2,309,942       | 550,789                    | 40,864                      |
| NOD              | Female | nTreg           | MM7    | 1,262,693          | 4,479,584       | 1,125,054                  | 173,355                     |
|                  |        |                 | MM8    | 663,051            | 2,429,643       | 592,815                    | 71,037                      |
|                  |        |                 | MM9    | 910,987            | 2,601,781       | 822,592                    | 86,159                      |
|                  |        | CD4 Teff        | MM7    | 3,560,531          | 5,999,296       | 1,212,278                  | 207,209                     |
|                  |        |                 | MM8    | 4,083,330          | 4,051,115       | 742,367                    | 180,372                     |
|                  |        |                 | MM9    | 4,794,056          | 3,286,016       | 734,086                    | 112,917                     |
|                  |        | amTreg          | MM7    | 1,015,255          | 3,069,939       | 685,274                    | 97,993                      |
|                  |        |                 | MM8    | 525,617            | 3,459,893       | 644,604                    | 77,448                      |
|                  |        |                 | MM9    | 1,044,756          | 4,664,421       | 912,418                    | 134,700                     |
|                  | Male   | nTreg           | MM10   | 2,829,659          | 44,533,470      | 924,356                    | 228,347                     |
|                  |        |                 | MM11   | 1,187,673          | 4,842,671       | 1,152,406                  | 171,911                     |
|                  |        |                 | MM12   | 1,417,099          | 3,743,743       | 905,722                    | 162,334                     |
|                  |        | CD4 Teff        | MM10   | 1,828,793          | 8,402,032       | 1,440,109                  | 293,362                     |
|                  |        |                 | MM11   | 4,069,621          | 4,026,173       | 812,452                    | 137,904                     |
|                  |        |                 | MM12   | 5,129,815          | 5,104,745       | 1,242,181                  | 172,096                     |
|                  |        | amTreg          | MM10   | 1,439,570          | 4,483,668       | 1,118,172                  | 140,069                     |
|                  |        |                 | MM11   | 954,098            | 2,936,788       | 551,128                    | 82,532                      |
|                  |        |                 | MM12   | 1,073,035          | 5,172,199       | 926,015                    | 116,134                     |
| NOD AAV-IL2      | Female | nTreg           | M1     | 260,496            | 561,066         | 180,251                    | 24,024                      |
|                  |        |                 | M2     | 298,114            | 1,722,615       | 578,756                    | 34,327                      |
|                  |        |                 | M3     | 279,845            | 1,903,257       | 563,135                    | 30,487                      |
|                  |        |                 | M4     | 221,511            | 2,582,384       | 817,599                    | 45,441                      |
|                  |        |                 | M5     | 160,748            | 3,020,522       | 884,592                    | 45,018                      |
|                  |        |                 | M6     | 178,671            | 3,628,737       | 943,936                    | 51,778                      |
|                  |        | CD4 Teff        | M1     | 4,202,771          | 3,634,559       | 706,155                    | 165,175                     |
|                  |        |                 | M2     | 4,683,268          | 2,885,576       | 689,779                    | 165,703                     |
|                  |        |                 | M3     | 3,922,300          | 4,688,586       | 1,170,572                  | 182,343                     |
|                  |        |                 | M4     | 4,226,220          | 3,575,702       | 1,003,248                  | 115,356                     |
|                  |        |                 | M5     | 3,814,764          | 4,931,386       | 1,054,540                  | 181,844                     |
|                  |        |                 | M6     | 3,763,450          | 3,252,391       | 644,635                    | 139,630                     |
|                  |        | amTreg          | M1     | 734,338            | 1,055,355       | 346,526                    | 15,037                      |
|                  |        |                 | M2     | 690,255            | 1,241,344       | 526,005                    | 8,224                       |
|                  |        |                 | M3     | 556,780            | 1,393,314       | 398,156                    | 22,360                      |
|                  |        |                 | M4     | 741,106            | 1,888,828       | 494,156                    | 19,905                      |
|                  |        |                 | M5     | 465,508            | 1,906,114       | 497,337                    | 21,903                      |
|                  |        |                 | M6     | 507,546            | 1,762,516       | 455,426                    | 19,596                      |

**Table S2. Sample properties.** MM: non-treated pools of mice, M: IL-2 treated NOD mice; Number of FACS-ARIA sorted cells, sequencing read counts, number of productive TR sequences, number of unique amino acid clonotypes.

| Mouse background | Sample | Proportion in CD4+ T cells (%) |       | Proportion in Tregs (%) |         |
|------------------|--------|--------------------------------|-------|-------------------------|---------|
|                  |        | Tefts                          | Tregs | nTregs                  | amTregs |
| NOD AAV-IL2      | M1     | 74.2                           | 24.1  | 8.1                     | 74.7    |
|                  | M2     | 76.8                           | 22.0  | 11.3                    | 70.4    |
|                  | M3     | 74.8                           | 23.7  | 11.2                    | 73.8    |
|                  | M4     | 77.8                           | 21.0  | 13.7                    | 71.5    |
|                  | M5     | 81.0                           | 17.8  | 13.2                    | 69.6    |
|                  | M6     | 79.8                           | 18.9  | 12.7                    | 70.9    |

**Table S3. Cell proportions in AAV-IL-2–treated NOD mice**

| Mouse background   | Cell population | Sample | Expanded clonotypes |            |
|--------------------|-----------------|--------|---------------------|------------|
|                    |                 |        | Number              | Percentage |
| C57BL/6            | nTreg           | MM1    | 8,480               | 3.63       |
|                    |                 | MM2    | 4,863               | 2.23       |
|                    |                 | MM3    | 2,878               | 2.12       |
|                    | CD4 Teff        | MM1    | 7,015               | 3.14       |
|                    |                 | MM2    | 3,324               | 2.76       |
|                    |                 | MM3    | 5,921               | 3.42       |
|                    | amTreg          | MM1    | 3,883               | 4.01       |
|                    |                 | MM2    | 3,352               | 3.29       |
|                    |                 | MM3    | 2,490               | 3.61       |
|                    | nTreg           | MM4    | 3,961               | 1.99       |
|                    |                 | MM5    | 4,230               | 2.16       |
|                    |                 | MM6    | 1,799               | 3.30       |
|                    | CD4 Teff        | MM4    | 6,393               | 2.13       |
|                    |                 | MM5    | 3,910               | 2.03       |
|                    |                 | MM6    | 1,336               | 1.90       |
|                    | amTreg          | MM4    | 4,269               | 3.99       |
|                    |                 | MM5    | 4,001               | 3.18       |
|                    |                 | MM6    | 1,625               | 3.98       |
| NOD                | nTreg           | MM7    | 5,980               | 3.45       |
|                    |                 | MM8    | 3,148               | 4.43       |
|                    |                 | MM9    | 3,460               | 4.02       |
|                    | CD4 Teff        | MM7    | 8,085               | 3.90       |
|                    |                 | MM8    | 6,061               | 3.36       |
|                    |                 | MM9    | 4,921               | 4.36       |
|                    | amTreg          | MM7    | 3,821               | 3.90       |
|                    |                 | MM8    | 2,950               | 3.81       |
|                    |                 | MM9    | 4,797               | 3.56       |
|                    | nTreg           | MM10   | 8,023               | 3.51       |
|                    |                 | MM11   | 6,924               | 4.03       |
|                    |                 | MM12   | 6,410               | 3.95       |
|                    | CD4 Teff        | MM10   | 8,617               | 2.94       |
|                    |                 | MM11   | 5,445               | 3.95       |
|                    |                 | MM12   | 6,082               | 3.53       |
|                    | amTreg          | MM10   | 6,043               | 4.31       |
|                    |                 | MM11   | 3,007               | 3.64       |
|                    |                 | MM12   | 4,440               | 3.82       |
| NOD AAV-IL2 Female | nTreg           | M1     | 761                 | 3.17       |
|                    |                 | M2     | 1,525               | 4.44       |
|                    |                 | M3     | 1,407               | 4.62       |
|                    |                 | M4     | 1,951               | 4.29       |
|                    |                 | M5     | 2,158               | 4.79       |
|                    |                 | M6     | 2,335               | 4.51       |
|                    | CD4 Teff        | M1     | 3,795               | 2.30       |
|                    |                 | M2     | 5,565               | 3.36       |
|                    |                 | M3     | 6,667               | 3.66       |
|                    |                 | M4     | 4,127               | 3.58       |
|                    |                 | M5     | 7,735               | 4.25       |
|                    |                 | M6     | 4,100               | 2.94       |
|                    | amTreg          | M1     | 765                 | 5.09       |
|                    |                 | M2     | 365                 | 4.44       |
|                    |                 | M3     | 1,043               | 4.66       |
|                    |                 | M4     | 925                 | 4.65       |
|                    |                 | M5     | 1,121               | 5.12       |
|                    |                 | M6     | 937                 | 4.78       |

**Table S4. Expanded clonotypes.** MM/M: mouse identifier; Number of expanded clonotypes, Percentage of expanded clonotypes: # of expanded clones divided by the total number of clonotypes

| Population | Pathology                    | TRBV      | CDR3             | TRBJ | Sharing |
|------------|------------------------------|-----------|------------------|------|---------|
| amTreg     | Type-1 diabetes              | 13-1      | CASSDDNIEQYF     | 2-7  | 2/6     |
|            |                              | 5         | CASSDRYEQYF      | 2-7  | 1/6     |
|            |                              | 16        | CASSLGQQDTQYF    | 2-5  | 1/6     |
|            |                              | 5         | CASSQRGANTEVFF   | 1-1  | 1/6     |
|            |                              | 16, 5     | CASSRDSSYEQYF    | 2-7  | 3/6     |
|            |                              | 17        | CASSRDWGYEQYF    | 2-7  | 1/6     |
|            | Systemic lupus erythematosus | 13-1      | CASSDSQNTLYF     | 2-4  | 1/6     |
|            |                              | 16        | CASSPRLGGNQDTQYF | 2-5  | 1/6     |
| nTreg      | Type-1 diabetes              | 1         | CTCSGGLGGREQYF   | 2-7  | 1/6     |
|            |                              | 13-2      | CASGGYEQYF       | 2-7  | 3/6     |
|            |                              | 13-3      | CASSDDNIEQYF     | 2-7  | 1/6     |
|            |                              | 13-3      | CASSDRYEQYF      | 2-7  | 1/6     |
|            |                              | 13-1      | CASSDSQNTLYF     | 2-4  | 2/6     |
|            |                              | 15        | CASSLGGNTEVFF    | 1-1  | 1/6     |
|            |                              | 16        | CASSLGGYAEQFF    | 2-1  | 1/6     |
|            |                              | 14        | CASSLGQQDTQYF    | 2-5  | 1/6     |
|            |                              | 12-1, 16  | CASSLGTGGYAEQFF  | 2-1  | 2/6     |
|            |                              | 12-2      | CASSLGWGDEQYF    | 2-7  | 1/6     |
|            |                              | 5         | CASSQRGANTEVFF   | 1-1  | 1/6     |
|            | Systemic lupus erythematosus | 19, 29, 5 | CASSRDSSYEQYF    | 2-7  | 4/6     |
|            |                              | 5         | CASSRDWGYEQYF    | 2-7  | 5/6     |
|            |                              | 19        | CASSILGNIAEQFF   | 2-1  | 1/6     |
|            |                              | 5         | CASSPRLGGNQDTQYF | 2-5  | 1/6     |
|            | Cancer                       | 1         | CTCSGGLGGREQYF   | 2-7  | 1/6     |
|            |                              | 13-1      | CASSGTGQDTQYF    | 2-5  | 1/6     |
|            |                              | 13-2      | CASGDAGTGYEQYF   | 2-7  | 1/6     |

**Table S5. List of sequences identified in both the annotated database and nTreg and amTreg samples from AAV-IL-2–treated NOD mice.**
